# Supplementary material for: Targeting non-coding RNAs with the CRISPR/Cas9 system in human cell lines
Source: PubMed Central journal article supplement (PMC4330338; doi:10.1093/nar/gku1198), 2014-11-20
Supplement: supp_gku1198_nar-02186-met-h-2014-File003.pdf [file supp_gku1198_nar-02186-met-h-2014-File003.pdf]

## Supplementary Materials

### Supplementary Table 1, Primers used in this study

|                         |                                             |
|-------------------------|---------------------------------------------|
| miR-21-T1 (gRNA1)       | ATGTTGACTGTTGAATCTCA                        |
| miR-21-T2 (gRNA2)       | CTCATGGCAACACCAGTCGA                        |
| miR-21-T3 (gRNA3)       | ATGTCAGACAGCCCATCGAC                        |
| miR-21-5.1              | GGTTCGATCTTAACAGGCCAG                       |
| miR-21-3.1              | GAGATGAACCACGACTAGAGG                       |
| miR-21-L-Spe-5.1        | GGCCAGTGAACTAGTGTCTTACAAGTGAGCTGACACC       |
| miR-21-L-Bsa1-3.1       | GCTATACGAAGTTATAGGTGGTACAGCCATGGAGAT        |
| miR-21-R-Bbs-5.2        | CATTATACGAAGTTATTTTGGTATCTTTCATCTGACCATCC   |
| miR-21-R-Sal-3.2        | TATCACCGGTGTGACCAAGAAAGGAAGGCACGAACAG       |
| miR-21-recom-5.2        | ACCCTCTGGGAAATTGATC                         |
| UCA1-T1 (gRNA1)         | GTGCATGGTGGAGAGATGAT                        |
| UCA1-E3-T1 (gRNA2)      | TTCTGGAATGGTGAACCCAA                        |
| UCA1-inside-5.3         | CCTTAAC TAATTAACCCACC                       |
| UCA1-inside-3.3         | AAGAGAGTCAGCGAAGGGAG                        |
| UCA1-intron1-5.1        | CTTTTCTCCAGCCTCTGTCTG                       |
| UCA1-intron1-3.1        | CAGACACCAGTGGAAATGTGG                       |
| UCA1-RT-5.2             | CTCCCTCCTCTGCTGACAAC                        |
| UCA1-RT-3.2             | GCACCAAGTGTCAAGCATGT                        |
| UCA1-outside-5.5        | AGTGAAACAGCCAATTCCTG                        |
| UCA1-outside-3.5        | TGATCGGCTCTCGGCCTAAT                        |
| UCA1-left-BamH1-5.1     | GCTCTAGA ACTAGTGGATCCGTCAGATCAGGTCATCCTAT   |
| UCA1-left-BamH1-3.1     | GCTATACGAAGTAGGGATCCAAGAATGTCACAGGGTCGAT    |
| UCA1-right-R1-5.2       | TTATACGAAGTTATGAATTCTAAAGCCATGCCCATCAGAC    |
| UCA1-right-R1-3.2       | ATAAGCTTGATATCGAATTCTTGAGCTTGGA ACTGCCCTA   |
| UCA1-recom-5.1          | CCGGCAAGTCTGACTCAAGT                        |
| 21A-dual-T1             | TATTTCTTCCATCACCATAA                        |
| 21A-dual-T2             | AAGTGTTTGAATTAGCAGGT                        |
| 21A-left-BamH1-5.1      | GCTCTAGA ACTAGTGGATCCtgggtagtctgagtccagaa   |
| 21A-left-BamH1-3.1      | GCTATACGAAGTAGGGATCCcacacttgggtcaactattta   |
| 21A-right-R1-5.1        | TTATACGAAGTTATGAATTCTgtagtgagcttttgattgcat  |
| 21A-right-R1-3.1        | ATAAGCTTGATATCGAATTCTCagggttaaatgagatggcatg |
| 21A-outside-5.1         | GAATGAATGAATGAACAGCT                        |
| 21A-outside-3.1         | AGATGACCTAAGAAATTTGG                        |
| 21A-recom-5.1A          | CCATCTGCGTCTCCTTTTCG                        |
| AK0-dual-T1-5.1         | GAGTTTTAGTCACCTATCTA                        |
| AK0-dual-I-T1-3.1       | GGTGATCCTTGTGCACGGCC                        |
| AK023948-RT-5.1         | CCCACAAAGCTCTTTTCTGC                        |
| AK023948-RT-3.1         | GGTGCCCAAGTAAAGCACAT                        |
| AK0-outside-5.1         | TTTTAAGCAAGGCTGGTGC                         |
| AK0-outside-3.1         | TCAGCTCAAGCTCCTATGGC                        |
| AK0-outside-5.2         | TCAGTCACTCCC ACTTATAA                       |
| AK0-outside-3.2         | TTAGGCCAATGTGCAATTAG                        |
| AK0-right-I-R1-5.1      | TTATACGAAGTTATGAATTCGGTGCCTCTCTGGCACTGAA    |
| AK0-right-I-R1-3.1      | ATAAGCTTGATATCGAATTCAGGTGGAACAGAGCATGTGC    |
| AK023948-left-BamH1-5.1 | GCTCTAGA ACTAGTGGATCCTCTACTCCTAGA ACTCCTTA  |

|                         |                                          |
|-------------------------|------------------------------------------|
| AK023948-left-BamH1-3.1 | GCTATACGAAGTAGGGATCCCGACTAGTTTTATTAGACAG |
| AKO-inside-5.1          | CAAATTACAGAACTACCAGT                     |
| AKO-inside-3.1          | TGAGCTTCCAGTAATGTTCC                     |
| AK0-RT-5.1              | CCCACAAAGCTCTTTTCTGC                     |
| AK0-RT-3.1              | GGTGCCCAAGTAAAGCACAT                     |
| Gas5-RT-5.2             | CAGTGTGGCTCTGGATAGCA                     |
| Gas5-RT-3.2             | TTAAGCTGGTCCAGGCAAGT                     |
| EF1-Seq-3.2             | ACCGGAGCGATCGCAGATCC                     |

Fig. S1

Pre-miR-21 (WT)

TGTCGGGTAGCTTATCAGACTGATGTTGACTGTTGAATCTCATGGCAACACCAGTCGATGGGCTGTCTGACAT

KO#3

1:  
TGTCGGGTAGCTTATCAGACTGATGTTGACTGTTGAATCTCATG  
GeaaeaccagtegatggGCTGTCTGACAT  
2:  
TGTCGGGTAGCTTATCAGACTGATGTTGACTGTTGAATCTCATG  
GCAACACCAGT**TGCCA**GATGGGCTGTCTGACAT

KO#4

1:  
TGTCGGGTAGCTTATCAGACTGATGTTGACTGTCGAATCTCatg  
geaaeaccagtegatGGGCTGTCTGACAT  
2:  
TGTCGGGTAGCTTATCAGACTGATGTTGACTGTTGAATCTCATG  
Geaaeaccagtegatgggetgtetgaeat~~tttgg~~TATCTT

KO#5

TGTCGGGTAGCTTATCAGACTGATGTTGACTGTTGAATCTCATG  
GCAACACCAGTC**GGGCGCACGCGCTGGGTGTTCCCGCCTAGT**  
**GACTGGGCCCGCATTCTTGGAGCGGGTTGATGACGTCAGC**  
**GTTTCGAATTACC**GATGGGCTGTCTGACAT

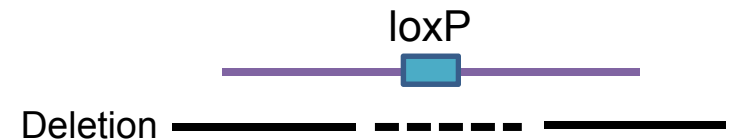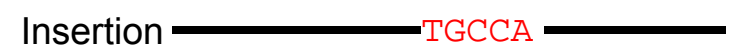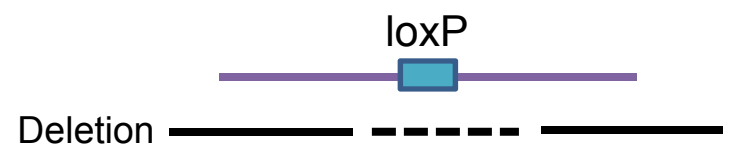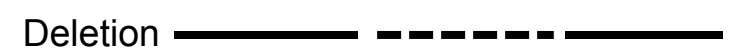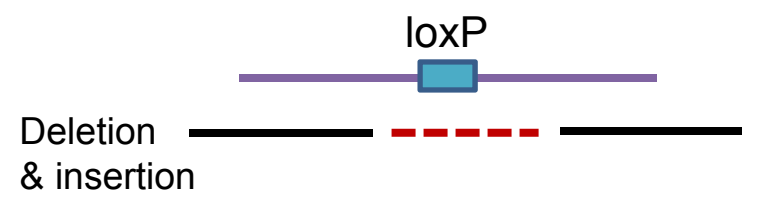

Fig. S2

A

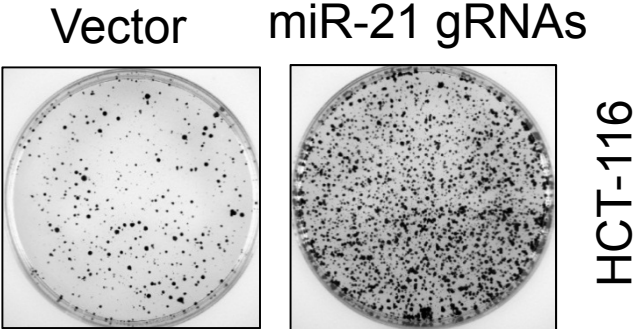

B

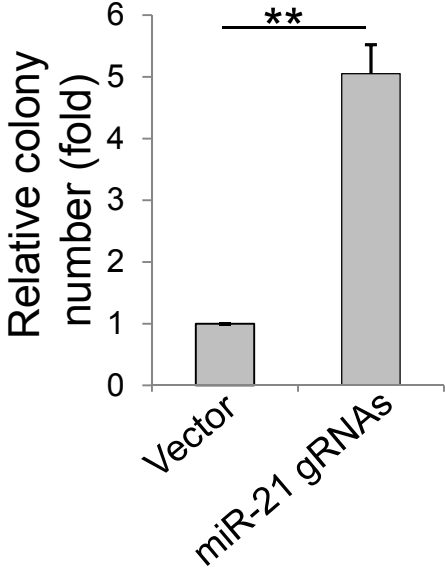

Pre-miR-21 (WT)

TGTCGGGTAGCTTATCAGACTGATGTTGACTGTTGAATCTCATGGCAACACCAGTCGATGGGCTGTCTGACAT

C

WT (238 bp)

TATGAGCATTATGTCAGAATAGAATAGAATTGGGGTTCGATCTTAACAGGCCAGAAATGCCTGGGTTTTTTTTGGTTTGT  
 TGTTTTGTTTTTTTATCAAATCCTGCCTGACTGTCTGCTTGTTTTGCCTACCATCGTGACATCTCCATGGCTGTACCACCTTGT  
 CGGGTAGCTTATCAGACTGATGTTGACTGTTGAATCTCATGGCAACACCAGTCGATGGGCTGTCTGACAT

KO #2 (235 bp)

TATGAGCATTATGTCAGAATAAGTCCCTATAGAGCTTTTTTTGGCCATTTGTTTATAAATATTTGTTTGCCTCTGGATAGTCT  
 CATCTTCTCAAGTTGTGCCTACCTCCTCCAACATGATGCTCTGTTTGCATTTCACAAAACATCTTATGTTTGTCAATCGAG  
 ATGATTTCCCACTCTCATTATCCTGTCTTGCCTAAGGACTATGTCGATGGGCTGTCTGACAT

KO #17 (202 bp)

TATGAGCATTATGTCAGAATAGAATAGAATTGGGGTTCGATCTTAACAGGCCAGAAATGCCTGGGTTTTTTTTGGTTTGT  
 TGTTTTGTTTTTTTATCAAATCCTGCCTGACTGTCTGCTTGTTTTGCCTACCATCGTGACATCTCCATGGCTGTACCACCTTGT  
 CGGGTAGCTTATCGTAACTGATGTTGACTGTTGAATCTCATGGCAACACCACTGATGGGCTGTCTGACAT

D

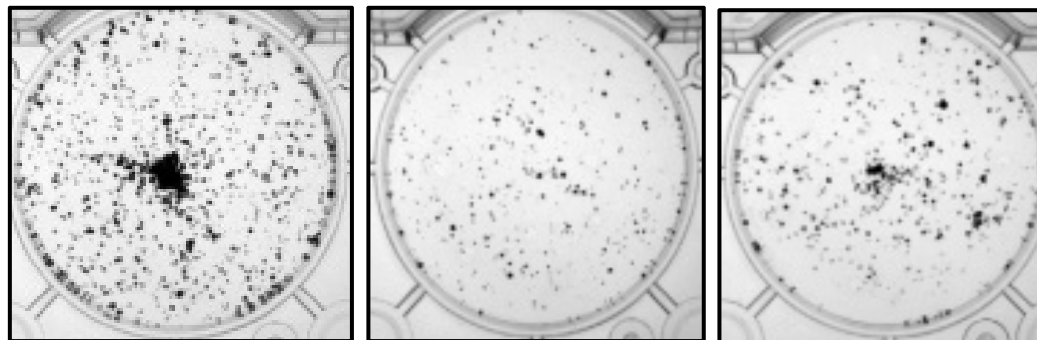

HCT-116

Vector

miR-21 KO #2

miR-21 KO #17

Fig. S3

A

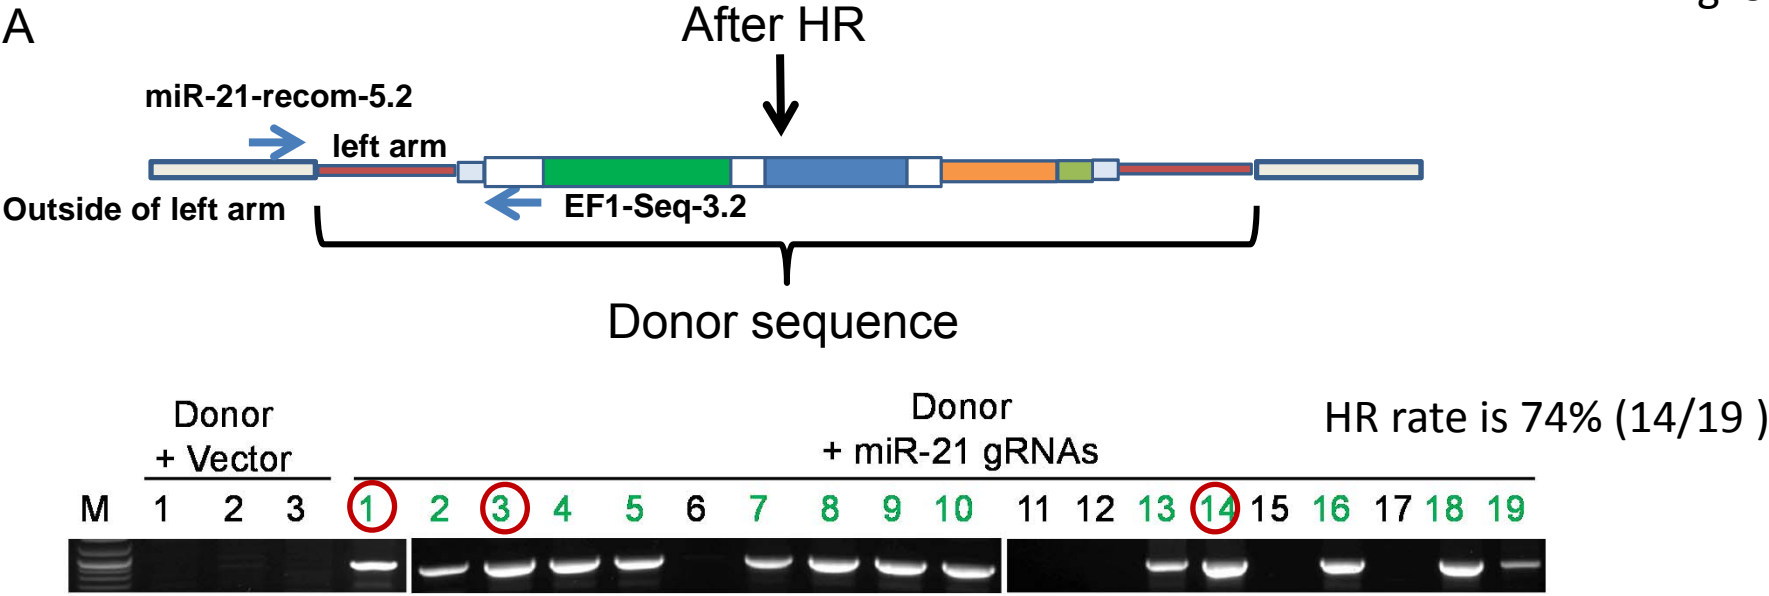

B

DNA sequences of junction PCR products for miR-21 knockout  
Outside (miR-21-recom-5.2)

Left arm

ACCTCTGGGGAAATTGATCTTTAAATTTTGAGACAGTATAAGGAAAATCTGGTTGGT  
GTCTTACAAGTGAGCTGACACCATTTTTTATTCTGTGTATTTAGAATGAAGTCTTGAAAAAACTTTATA  
AAGACATCTTTAATCATTCCAAAATGTGTCCGTTTTCTTGAGCGTTTTGATTTTTACTTTTAGCTTAT  
ACCAGCTGAATGGCAGCCTTGCCCTAATCCACCTACAACAAGAATTTCTTAAGCTTTCTTTTATTGTCATG  
AGAGAGCCACTACCAAGGCATGTTTGTATGCTGAAACTGGGCTGCTGCATACTGCTAAATGGCACCTC  
TGGGATTGGCCTACCTGGGGATTTCTTGGTTTGTGAAAACAGGAGAGGAGAAATATCTCATAACAAGTGAA  
AGGATACTGGAGAGAGAAATTACCCATTTCTAAAAAAAACCACACTCTGTTCGTATCTGTGTTAATGTTT  
TCTAGCATGTACTCTGGTTTCAACAGACACAAAATTTATATGTTAACCAGTTTTCTTGCCGTTCTGTAAG  
TGTTTTATTCTTAGTGTGATTTTTTTCCATTGGGATGTTTTTGAATTGAACCTTGTTCATTTTGTTTTGCTT  
GGGAGGAAAATAAACAAATTTTACTTTTTTCTTTAGGAGCATTATGAGCATTATGTCAGAATAGAATAGA  
ATTGGGGTTTCGATCTTAACAGGCCAGAAATGCCTGGGTTTTTTGGTTTTGTTTTGTTTTGTTTTTA  
TCAAATCCTGCCTGACTGTCTGCTTGTGTTTTGCCTACCATCGTGACATCTCCATGGCTGTACCACCTATAA  
CTTCG TATAGCATACATTATACGAAGTTATGCTAGCAAGGATCTGCGATCGCTCCGGT

Donor vector      EF1-Seq-3.2

Fig. S4

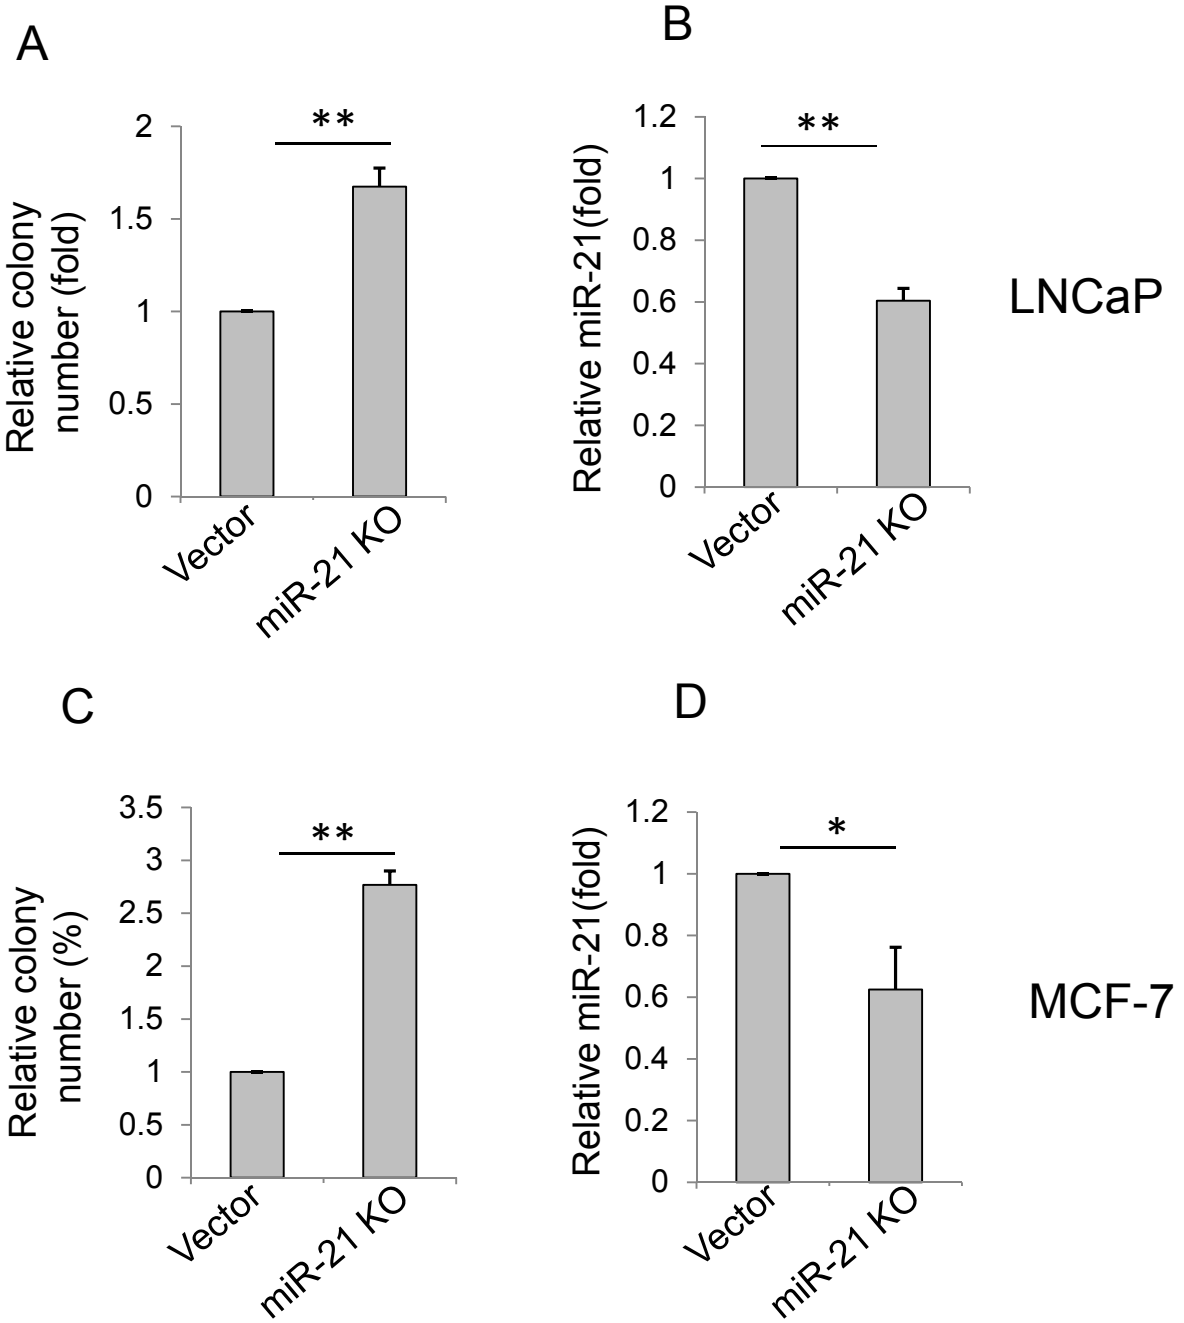

Fig. S5

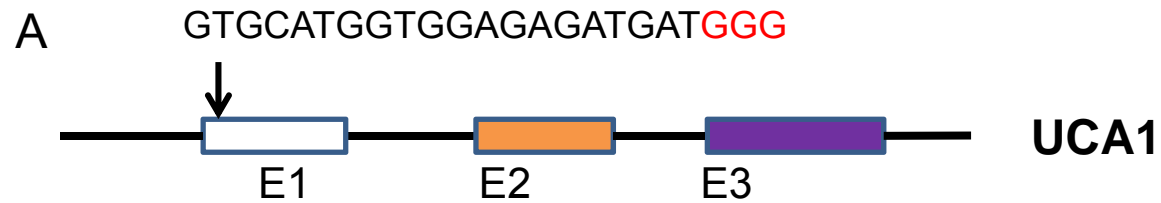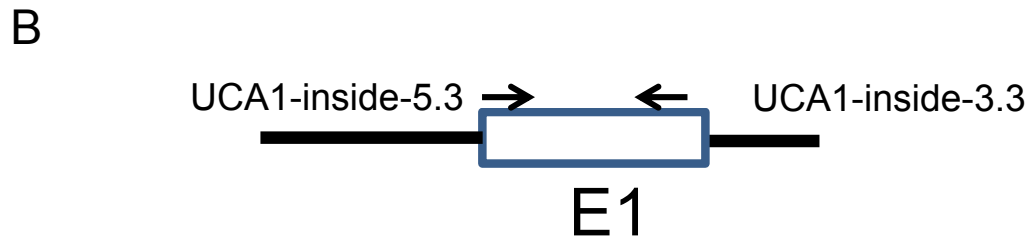

C

Outside (UCA1-recom-5.1)

**CCGGCAAGTCTGACTCAAGT**GTCAGATCAGGTCATCCTATATAACCTCAGACATGCCCCAAACCTGTGC  
 TGCTCACATATATACTCAGTGACCACCCTCCCAGAAGACACTGCATTGTGTGCGTTTCAGCTTTTTGCGT  
 CACCTCAGTGAAGGTGGTTTTTCCTGTCCTTAGCCATAGTTTTCTCCCTTCACTAGGCTAAGAGGATTCAA  
 AGGACAGGGATCATTCCAGTCTTTTCCCTTCAATAGCAGCATCTGAGTGGCTGACCAGAGAGGTATTTCC  
 AAGAAGTGAAAAGTGGGCTTGGGGTGAGAAAAGCTAAATGTCCTAAGGGGTTTTCTTTTAGATGACGGAG  
 GGAGATACCAGGGGACTCCTCCCTCCCGGGAGGTAGGGGGAGGGGGTGCACCCGGCGGCTCCCCTGAGAG  
 GCCCCACAGGCACATCTCAGGCTGTCTCTGGGAAGAAATGACCCAGGAGCTGATATTCATGACCCCTCCA  
 AGAGACCCGGCAGCTTGTGGGCATCTCAGATGAGCCCCAGGCAGTTCTGAAACCCAGGACCAGGAAAAGA  
 TAAGAGGGTGGGCTGAGGTCACATCACCTGTAACGTTTCCAAAAGGGAAGTGTGAGGCCTCTGAGCCGA  
 AGCTCAGCCATTGTAACCCCTGTGACCTGCACATATATGTCCAGGTGGCCTACAGGAGCCAAGAAGTCTG  
 GAGCAGCTGAAAAACAAGGAAGTGAACAGCCAATTCTGCCTTAACTAATTAACCCACCTTACGACATT  
 CCACCATTATGACGTGTTCTGCCCTGCCCAACTGATCAATCGACCCTGGATCCCTACTTCGTATAGC  
**ATACATTATACGAAGTTATAAGGATCTGCGATCGCTCCGGT**

Left arm

EF1-Seq-3.2

Donor vector



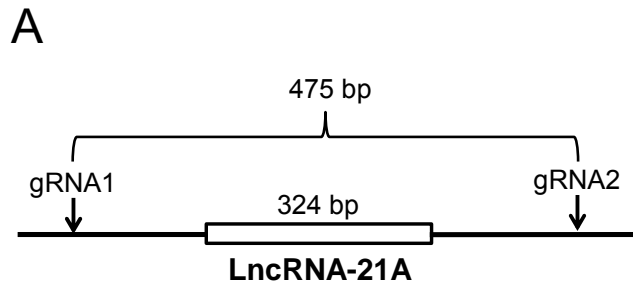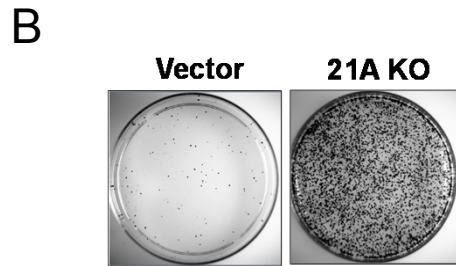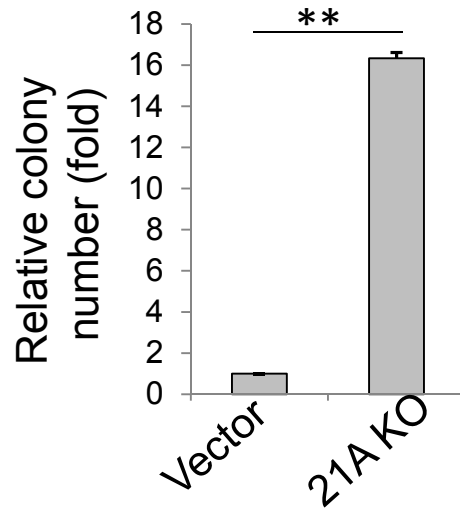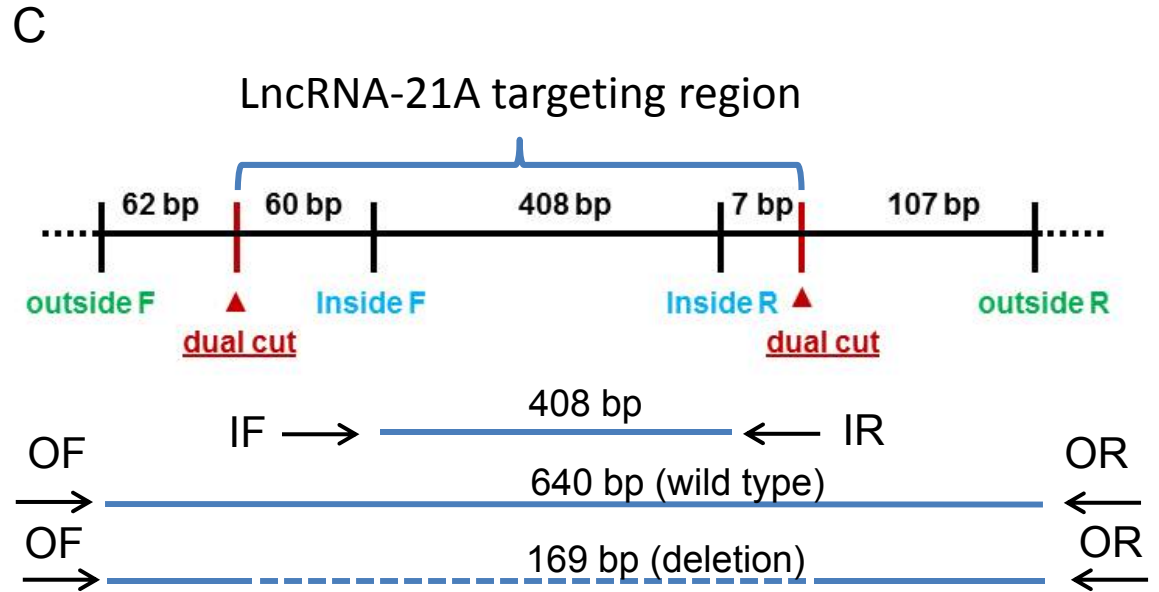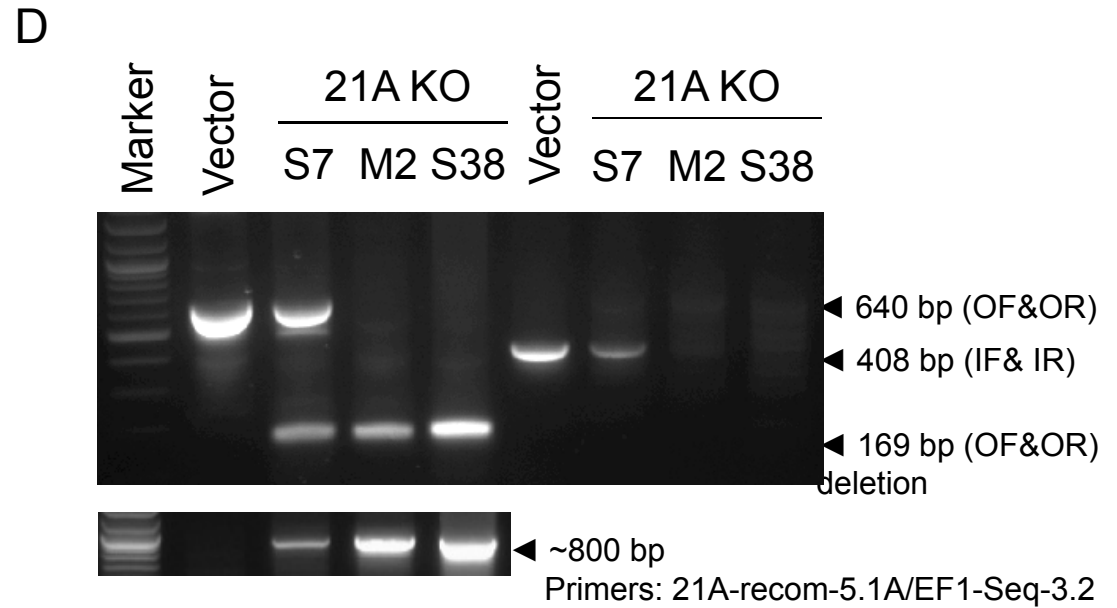

E

Outside (21A-recom-5.1A)

**CCATCTGCGTCTCCTTTTCGGT**GTGGAAAGCTGGTAAGTGAGGACACCAGGATTGGAACC**TGGGTAGTCT**  
 GAGTCCAGAATCTCTATTTTCAAGTCTTCCTGCTCTCTGCTTCTGGCAAGTTTGATGTCCACTTTTGATC  
 TTCACCTACATTCCAGCATAATAGCTACTTTTGGTTGTTTTCTCAGCAGCACAAAGAGAAGTGTGGCGAGA  
 TTTTGTAGGTGAGTCATCTAGAGAAGTTAATCTTATTTGGGAATTCTACTGGCAGCTTCAGGTGGGAAA  
 ATTTTGTATTTTCTATCCTCCTCTAGGTTCTAAAAGGGAAGAAAGATGGTGAGCGTAGAAAGATGTGAC  
 TGTATTCACTATTACCCCTTTGTCGGTGGTGAGTAAGCAGCTTGCAAAGCAATGAAGTTTGGAAACAAT  
 CCAGAGAACCAACTTTCAGCTGCCAGAGATGGCACCTGGTATCCTGGGTACATCTGCCTGTAGGGCCCA  
 GAAAGAGCTGGAAGCCAAGTGCATGGATCAGGTCTGTAGGAAGGTGGGAGAGCCAGGAATCGAGTGTGAG  
 GGGGCATTTATTACCCATGGAAGCAGGTTTTTGTCAATTTTGTTCACTGCTGGATCACTAACACCTGGAC  
 TGGTGCCTGGCCAGGTGGTGGCTTCATAATCATTTGTTGAGTGAATCAATGAATGAATGAATGAACAGCT  
 GTAGCAGATGCTAGCAGGGCTTCCTATTTCTTCCATCACCATAAAGGTGAAAGACATCATAAACGGGAAT  
 TTAGACAATCCTCAGAAATTTTCAACTGCCATGTATCTTGACTTGATGCTTCTAGTAGTTATATTTATTT  
 GTAATTCATCTTTCTTTTAAATAGTTGACCAAGTGTGG**GGATCCCTACTTCGTATAGCATAACATTATAC**  
**GAAGTTATAAGGATCTGCGATCGCTCCGGT**

Left arm

EF1-Seq-3.2

Donor vector

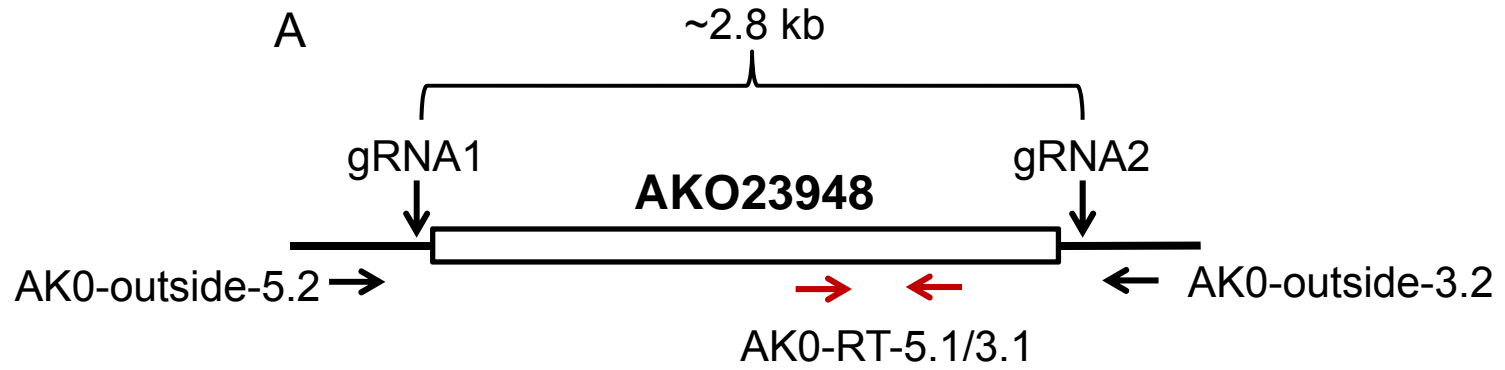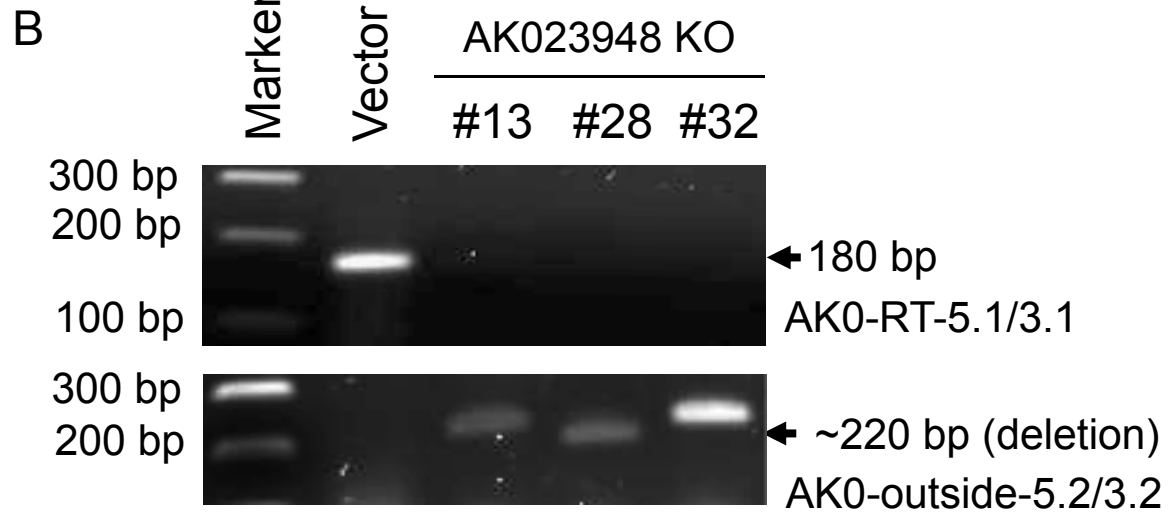

Fig. S8

A

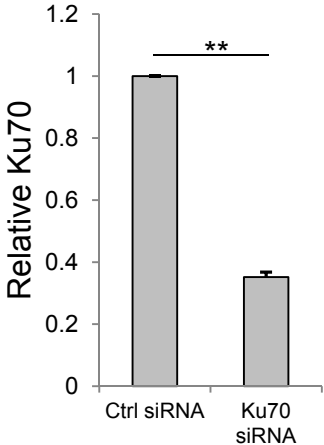

B

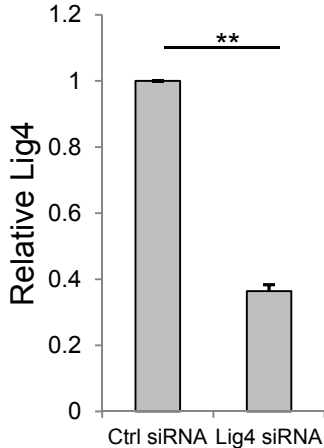

C

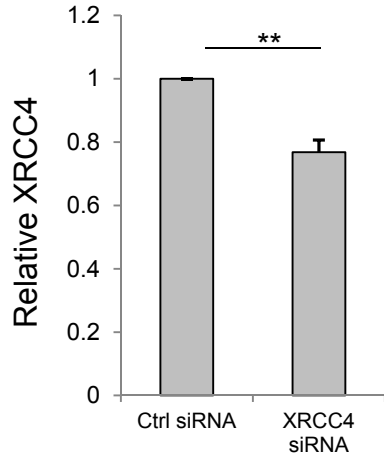

293T

D

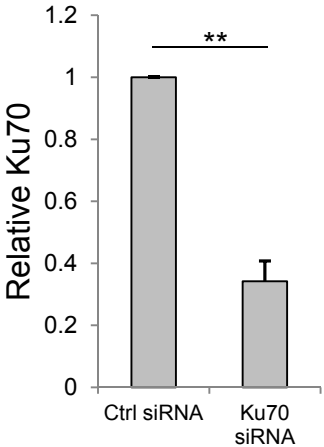

E

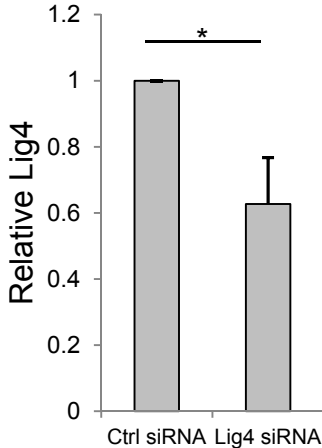

F

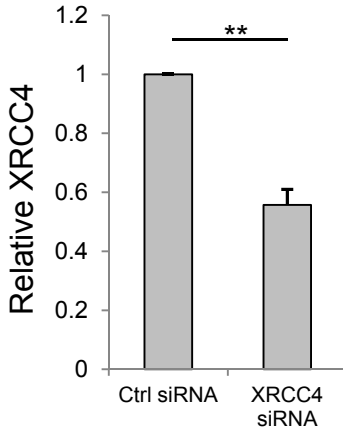

HCT-116

Fig. S9

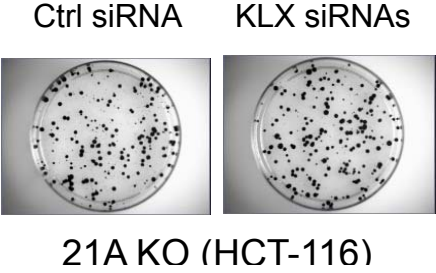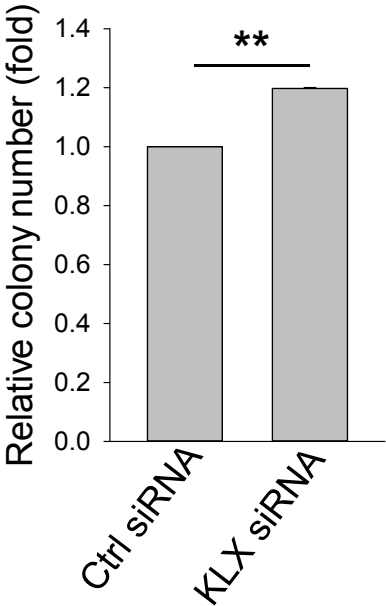

### Targeting miR-21, UCA1 and lncRNA-21A

| Gene       | HR event*      |               |
|------------|----------------|---------------|
|            | Vector + donor | gRNAs + donor |
| miR-21     | 0/3 (0%)       | 14/19 (74%)   |
| UCA1       | 0/3 (0%)       | 17/20 (85%)   |
| lncRNA-21A | (0%)**         | 7/8 (87.5%)   |

\* Based on junction PCR products for individual clones. PCR primers are miR-21-recom-5.2/EF1-Seq-3.2 for miR-21, UCA1-recom-5.1/EF1-Seq-3.2, and 21A-recom-5.1A/EF1-Seq-3.2 for lncRNA-21A, respectively.

\*\* A mixed pool of over 10 clones was used for junction PCR.

## Supplementary figure legend

**Fig. S1 Identification of alterations in targeted region of miR-21 as revealed by DNA sequencing.** The sequence on top indicates pre-miR-21 and mature miR-21 sequence is underlined. The sequence carrying the loxP copy is not listed here. Nucleotides in red are insertions and low case cross-outs are deletions. Schematic descriptions are shown on the right.

**Fig. S2 Knockout of miR-21 in HCT-116 cells.** Knockout of miR-21, as a mixed pool, resulted in high colony number after puromycin selection compared to vector control. (A) representative images showing colony formation. (B) Overall results. Values are means of  $\pm$  SE (n = 3), \*\*, p < 0.01. (C) DNA sequences for PCR products from clone #2 and #17. Insertion sequences are shown in blue and cross-cut indicates a deletion. (D) Knockout of miR-21 causes cell growth inhibition as shown by colony formation for clone #2 and #17 compared to vector control.

**Fig. S3 Characterization of miR-21 knockout clones in HCT-116 cells.** (A) Identification of HR events by junction PCR using primers, as indicated on top panel and junction PCR products at bottom panel. See Fig. 1C for description of miR-21 donor vector. While donor + vector control revealed no HR event from 3 clones, donor + miR-21 gRNAs resulted in ~74% HR rate (14/19). (B) DNA sequencing of three randomly selected PCR products (clone #1, #3 and #14) directly isolated from the gel revealed identical sequences.

**Fig. S4 miR-21 knockout in LNCaP (A & B) and MCF-7 cells (C & D),** as measured by colony formation after puromycin selection and relative miR-21 expression for a mixed pool as detected by qRT-PCR. Values are means of  $\pm$  SE (n = 3). \*, p < 0.05. \*\*, p < 0.01.

**Fig. S5 UCA1 knockout using a single gRNA or dual gRNA approach.** (A) Location of UCA1 gRNAs targeting exon 1 for single gRNA and the gRNA sequence is shown on top with PAM in red. (B) Location of primers used for detection of KO clones by genomic PCR. (C) An identical sequencing result for junction PCR products from clone #3, #5 and #18 (Fig. 5D).

**Fig. S6 Knockout of lncRNA-21A in HCT-116 cells.** (A) Strategy for targeting lncRNA-21A, indicating gRNA sites. (B) Colony formation after puromycin selection as a mixed pool. Values are means of  $\pm$  SE (n = 3). \*\*, p < 0.01. (C & D) Identification of lncRNA-21 KO clones by genomic PCR and expected sizes of PCR products. PCR primers OF/OR were able to detect wild type fragment

(640 bp) and deleted fragment (169 bp); junction PCR primers (21A-recom-5.1A/EF1-Seq-3.2) were able to detect HR events (~800 bp). All three clones, but not vector control, carried a deleted fragment and a HR fragment which was verified by DNA sequencing. However, clone S7 still carried a wild type fragment like vector control. Therefore, clones M2 and S38 are complete knockouts, whereas clone S7 is a partial knockout. (E) DNA sequencing of junction PCR products (clone S7, M2 and S38) directly recovered from the gel revealed identical sequences.

**Fig. S7 Knockout of AK023948 in MCF-7 cells.** (A) Strategy for targeting AK023948, indicating gRNA sites and primers for PCR. (B) Identification of AK023948 KO clones by genomic PCR and relative locations of inside or outside primers. All of three clones are complete knockouts because they all lacked a 180 bp band.

**Fig. S8 Suppression of Ku70, Lig4 and XCCR4 by RNAi.** (A) Detection of Ku70 (A), Lig4 (B) and XCCR4 (C) in HEK293T cells by qRT-PCR. Detection of Ku70 (D), Lig4 (E) and XCCR4 (F) in HCT-116 cells by qRT-PCR.

**Fig. S9 Enhancing the CRISPR/Cas9-mediated targeting efficiency for lncRNA-21A by siRNAs against Ku70, Lig4 and XRCC4 (KLX siRNAs) in HCT-116 cells.**

**Fig. S10 Detection of HR by junction PCR for miR-21, UCA1 and lncRNA-21A knockout.**
